# Supplementary material for: Analysis of serum and gene expression profile of cytokines (IL-6, TNF-α and TGF-β1) in chronic hepatitis C virus infection
Source: PeerJ. 2022 Apr 20;10:e13330. doi: 10.7717/peerj.13330 (PMC9034700; doi:10.7717/peerj.13330)
Supplement: Supplemental Information 1 [file peerj-10-13330-s001.xlsx]

## Sheet: IL-6
Experiment:	Dr Ismail USM Kelantan LXSAHM
R& D System Kit:	Human Premixed Multi-Analyte Kit LXSAHM
Sample ID	Net MFI (Average)	Test Result (Average)	% CV of Replicates	Unit	Dilution factor
Sample 1	0.5	<3.955	0	pg/ml	2
Sample 2	1	<3.955	0	pg/ml	2
Sample 3	1	<3.955	0	pg/ml	2
Sample 4	0.5	<3.955	0	pg/ml	2
Sample 5	1.25	<3.955	0	pg/ml	2
Sample 6	0.5	<3.955	0	pg/ml	2
Sample 7	2.5	<3.955	0	pg/ml	2
Sample 8	1	<3.955	0	pg/ml	2
Sample 9	1.5	<3.955	0	pg/ml	2
Sample 10	2	<3.955	0	pg/ml	2
Sample 11	1.5	<3.955	0	pg/ml	2
Sample 12	-1.25	<3.955	0	pg/ml	2
Sample 13	1.5	<3.955	0	pg/ml	2
Sample 14	11	<3.955	0	pg/ml	2
Sample 15	7.5	<3.955	0	pg/ml	2
Sample 16	10.5	<3.955	0	pg/ml	2
Sample 17	36.25	12.159	0.901	pg/ml	2
Sample 18	21	<3.955	0	pg/ml	2
Sample 19	4.5	<3.955	0	pg/ml	2
Sample 20	10.75	<3.955	0	pg/ml	2
Sample 21	0	<3.955	0	pg/ml	2
Sample 22	7.5	<3.955	0	pg/ml	2
Sample 23	1.5	<3.955	0	pg/ml	2
Sample 24	1	<3.955	0	pg/ml	2
Sample 25	7.5	<3.955	0	pg/ml	2
Sample 26	-0.5	<3.955	0	pg/ml	2
Sample 27	2	<3.955	0	pg/ml	2
Sample 28	1.5	<3.955	0	pg/ml	2
Sample 29	30.5	10.379	2.107	pg/ml	2
Sample 30	6	<3.955	0	pg/ml	2
Sample 31	3.5	<3.955	0	pg/ml	2
Sample 32	1	<3.955	0	pg/ml	2
Sample 33	-0.5	<3.955	0	pg/ml	2
Sample 34	9	<3.955	0	pg/ml	2
Sample 35	1.5	<3.955	0	pg/ml	2
Sample 36	8.5	<3.955	0	pg/ml	2
Sample 37	3.5	<3.955	0	pg/ml	2
Sample 38	5	<3.955	0	pg/ml	2
Sample 39	3	<3.955	0	pg/ml	2

## Sheet: TNF-a
Experiment:	Dr Ismail USM Kelantan LXSAHM
R& D System Kit:	Human Premixed Multi-Analyte Kit LXSAHM
Sample ID	Net MFI (Average)	Test Result (Average)	% CV of Replicates	Unit	Dilution factor
Sample 1	11	<6.854	0	pg/ml	2
Sample 2	10	<6.854	0	pg/ml	2
Sample 3	8.25	<6.854	0	pg/ml	2
Sample 4	6	<6.854	0	pg/ml	2
Sample 5	5	<6.854	0	pg/ml	2
Sample 6	6.25	<6.854	0	pg/ml	2
Sample 7	5.75	<6.854	0	pg/ml	2
Sample 8	9.25	<6.854	0	pg/ml	2
Sample 9	6.5	<6.854	0	pg/ml	2
Sample 10	6.75	<6.854	0	pg/ml	2
Sample 11	4.25	<6.854	0	pg/ml	2
Sample 12	5.25	<6.854	0	pg/ml	2
Sample 13	9.25	<6.854	0	pg/ml	2
Sample 14	11.75	<6.854	0	pg/ml	2
Sample 15	11.75	<6.854	0	pg/ml	2
Sample 16	12	<6.854	0	pg/ml	2
Sample 17	18.5	<6.854	0	pg/ml	2
Sample 18	72	34.783	6.28	pg/ml	2
Sample 19	4.25	<6.854	0	pg/ml	2
Sample 20	15.75	<6.854	0	pg/ml	2
Sample 21	7	<6.854	0	pg/ml	2
Sample 22	11.25	<6.854	0	pg/ml	2
Sample 23	8.25	<6.854	0	pg/ml	2
Sample 24	8.25	<6.854	0	pg/ml	2
Sample 25	10.5	<6.854	0	pg/ml	2
Sample 26	3.75	<6.854	0	pg/ml	2
Sample 27	11.75	<6.854	0	pg/ml	2
Sample 28	10.75	<6.854	0	pg/ml	2
Sample 29	30.25	14.902	6.797	pg/ml	2
Sample 30	13.75	<6.854	0	pg/ml	2
Sample 31	7.25	<6.854	0	pg/ml	2
Sample 32	7.5	<6.854	0	pg/ml	2
Sample 33	10.75	<6.854	0	pg/ml	2
Sample 34	9.75	<6.854	0	pg/ml	2
Sample 35	4.75	<6.854	0	pg/ml	2
Sample 36	9.25	<6.854	0	pg/ml	2
Sample 37	6.25	<6.854	0	pg/ml	2
Sample 38	5.75	<6.854	0	pg/ml	2
Sample 39	11	<6.854	0	pg/ml	2
