# Supplementary material for: Analysis of serum and gene expression profile of cytokines (IL-6, TNF-α and TGF-β1) in chronic hepatitis C virus infection
Source: PeerJ. 2022 Apr 20;10:e13330. doi: 10.7717/peerj.13330 (PMC9034700; doi:10.7717/peerj.13330)
Supplement: Supplemental Information 2 [file peerj-10-13330-s002.xlsx]

## Sheet: IL-6
CONTROL									HCV POSITIVE (HP)
B-act (HG)									B-act (HG)
Study code	Average CT		Study code	Average CT	Delta Ct	Delta2 CT	2^-delta2CT		Study code	Average CT		Study code	Average CT	Delta Ct	Delta2 CT	2^-delta2CT
HN 14	18.62		HN 14	30.4248	11.8048	8.8881	473.79		HP 40	18.94		HP 40	35.6524	16.7124	13.7957	14220.7
HN 15	18.88		HN 15	29.634	10.754	7.83725	228.69		HP 43	32.57		HP 43	36.5044	3.93443	1.01771	2.02471
HN 16	22.78		HN 16	31.6711	8.89108	5.97437	62.8729		HP 47	19.73		HP 47	31.3591	11.6291	8.71235	419.449
HN 19	21.97		HN 19	31.63	9.66	6.74328	107.135		HP 48	26.2		HP 48	32.84	6.64	3.72328	13.2075
HN 21	20.94		HN 21	30.4731	9.53313	6.61641	98.1158		HP 49	24.03		HP 49	32.746	8.71601	5.79929	55.6879
HN 22	22.97		HN 22	34.7725	11.8025	8.88577	473.024		HP 50	23.87		HP 50	33.1541	9.28407	6.36735	82.559
HS 38	31.26		HS 38	33.6404	2.38044	-0.536275	0.689549		HP 54	26.48		HP 54	33.7551	7.27512	4.35841	20.5121
HS 39	27.9		HS 39	35.0628	7.16281	4.24609	18.9758		HP 62	31.03		HP 62	33.5168	2.48684	-0.429875	0.742326
HS 40	23.85		HS 40	34.5584	10.7084	7.79166	221.576		HP 65	31.54		HP 65	33.45	1.91	-1.00672	0.497678
HS 41	20.53		HS 41	35.5396	15.0096	12.0928	4368.28		HP 67	34.88		HP 67	32.43	-2.45	-5.36672	0.0242358
HS 42	29.57		HS 42	33.9331	4.3631	1.44639	2.72524		HP 68	33.7		HP 68	36.16	2.46	-0.456717	0.728643
HS 43	22.16		HS 43	34.2878	12.1278	9.21113	592.69		HP 69	33.46		HP 69	32.8273	-0.632699	-3.54942	0.0854121
HS 44	34.36		HS 44	34.7789	0.418931	-2.49779	0.177048		HP 71	29.2		HP 71	33.62	4.42	1.50328	2.83487
HS 45	27.84		HS 45	33.4511	5.61114	2.69442	6.47296
HS 46	33.53		HS 46	33.5368	0.00684616	-2.90987	0.133058
HS 47	32.54		HS 47	33.7788	1.23881	-1.67791	0.312535
HS 49	33.97		HS 49	33.9938	0.02378	-2.89294	0.134629
HS 50	32.6		HS 50	34.5421	1.94211	-0.974606	0.508879
HS 51	29.71		HS 51	33.866	4.15604	1.23932	2.36088
				GEOMEAN	2.91672

## Sheet: TNF-a
CONTROL									HCV POSITIVE (HP)
B-act (HG)									B-act (HG)
Study code	Average CT		Study code	Average CT	Delta Ct	Delta2 CT	2^-delta2CT		Study code	Average CT		Study code	Average CT	Delta Ct	Delta2 CT	2^-delta2CT
HN 14	18.62		HN 14	27.6264	9.0064	4.50423	22.6939		HP 40	18.94		HP 40	32.5608	13.6208	9.11861	555.873
HN 15	18.88		HN 15	27.582	8.70197	4.19981	18.3767		HP 43	32.57		HP 43	34.3563	1.78631	-2.71585	0.152211
HN 16	22.78		HN 16	29.023	6.24296	1.7408	3.3422		HP 47	19.73		HP 47	29.8788	10.1488	5.6466	50.0952
HN 19	21.97		HN 19	28.351	6.381	1.87883	3.67777		HP 50	23.87		HP 50	30.6558	6.78579	2.28363	4.869
HN 21	20.94		HN 21	29.7585	8.81852	4.31636	19.9229		HP 54	26.48		HP 54	31.7022	5.22216	0.719992	1.64717
HN 22	22.97		HN 22	31.5265	8.55649	4.05432	16.614		HP 62	31.18		HP 62	32.6616	1.48156	-3.02061	0.123227
HS 38	31.26		HS 38	32.8427	1.5827	-2.91946	0.132177		HP 65	31.54		HP 65	34.4605	2.92053	-1.58163	0.334103
HS 39	27.9		HS 39	31.7105	3.81047	-0.691696	0.619126		HP 68	33.7		HP 68	35.0813	1.38129	-3.12087	0.114954
HS 40	23.85		HS 40	30.0573	6.20734	1.70518	3.26069		HP 69	33.46		HP 69	34.0034	0.543403	-3.95876	0.0643122
HS 42	29.57		HS 42	32.9347	3.36475	-1.13742	0.454573		HP 71	29.2		HP 71	32.5266	3.32657	-1.1756	0.442701
HS 43	22.16		HS 43	33.1128	10.9528	6.45061	87.4634
HS 45	27.84		HS 45	31.9697	4.1297	-0.372465	0.772462
HS 47	32.54		HS 47	33.4837	0.943692	-3.55847	0.0848775
HS 50	32.6		HS 50	33.9451	1.34509	-3.15708	0.112105
HS 51	29.71		HS 51	33.4247	3.71468	-0.787487	0.579352
				GEOMEAN	4.50217

## Sheet: TGF-b
CONTROL									HCV POSITIVE (HP)
B-act (HG)									B-act (HG)
Study code	Average CT		Study code	Average CT	Delta Ct	Delta2 CT	2^-delta2CT		Study code	Average CT		Study code	Average CT	Delta Ct	Delta2 CT	2^-delta2CT
HN 14	18.62		HN 14	22.0352	3.41525	1.26878	0.41501		HP 40	18.94		HP 40	30.2903	11.3503	9.20381	0.0016958
HN 15	18.88		HN 15	22.2441	3.36411	1.21764	0.429984		HP 47	19.73		HP 47	22.5934	2.86336	0.71689	0.608407
HN 16	22.78		HN 16	25.005	2.22502	0.0785561	0.947005		HP 49	24.03		HP 49	26.36	2.33	0.183531	0.880545
HN 19	21.97		HN 19	26.2464	4.27639	2.12992	0.228471		HP 50	23.87		HP 50	27.058	3.188	1.04153	0.485811
HN 21	20.94		HN 21	24.128	3.18799	1.04152	0.485816		HP 54	26.48		HP 54	29.0769	2.59695	0.450477	0.731801
HN 22	22.97		HN 22	26.6272	3.65725	1.51078	0.350922		HP 62	31.03		HP 62	32.8208	1.79085	-0.35562	1.27954
HS 38	31.26		HS 38	32.8967	1.63674	-0.509724	1.42378		HP 65	31.54		HP 65	33.2678	1.72785	-0.418624	1.33665
HS 39	27.9		HS 39	30.1482	2.24825	0.101779	0.931883		HP 67	34.88		HP 67	36.1513	1.27134	-0.875128	1.83417
HS 40	23.85		HS 40	26.3703	2.52033	0.373864	0.771713		HP 68	33.7		HP 68	35.1406	1.44057	-0.705899	1.63116
HS 41	20.53		HS 41	36.2034	15.6734	13.5269	8.47202e-05		HP 69	33.46		HP 69	35.074	1.61399	-0.532477	1.44641
HS 42	29.57		HS 42	31.4597	1.88975	-0.256723	1.19476		HP 71	29.2		HP 71	31.368	2.16799	0.0215226	0.985192
HS 43	22.16		HS 43	35.3321	13.1721	11.0257	0.000479675
HS 44	34.36		HS 44	35.5866	1.22664	-0.919829	1.89189
HS 45	27.84		HS 45	30.1907	2.35073	0.204258	0.867985
HS 46	34.53		HS 46	34.9486	0.418551	-1.72792	3.31249
HS 47	32.54		HS 47	33.2559	0.715861	-1.43061	2.6956
HS 49	33.97		HS 49	34.3143	0.344268	-1.8022	3.48752
HS 50	32.6		HS 50	32.8443	0.244292	-1.90218	3.73777
HS 51	29.71		HS 51	35.7022	5.99216	3.84569	0.0695553
				GEOMEAN	2.14647
