# Supplementary material for: Analysis of serum and gene expression profile of cytokines (IL-6, TNF-α and TGF-β1) in chronic hepatitis C virus infection
Source: PeerJ. 2022 Apr 20;10:e13330. doi: 10.7717/peerj.13330 (PMC9034700; doi:10.7717/peerj.13330)
Supplement: Supplemental Information 3 [file peerj-10-13330-s003.xlsx]

## Sheet: Raw OD
##BLOCKS= 1
Plate:	Plate1	1.3	PlateFormat	Endpoint	Absorbance	Raw	FALSE	1						2	450 540	1	12	96	1	8
	Temperature(¡C)	1	2	3	4	5	6	7	8	9	10	11	12		1	2	3	4	5	6	7	8	9	10	11	12
	25.3	2.6073	0.2951	1.0358	1.2002	0.9805	1.272	0.5434	1.2381	0.8982	0.9773	1.046	1.165		0.0748	0.0434	0.0509	0.0532	0.0526	0.0573	0.0438	0.0556	0.051	0.0541	0.0539	0.0523
		2.6649	0.2972	1.0275	1.1796	0.9858	1.2739	0.5663	1.2342	0.9646	0.8798	1.0503	1.1674		0.0755	0.0444	0.0514	0.0525	0.0469	0.0565	0.0443	0.056	0.0525	0.0509	0.054	0.0513
		1.7103	0.1819	1.4746	1.1083	1.4105	0.5163	1.1787	0.732	0.728	1.2603	0.8237	0.8655		0.0637	0.0432	0.0575	0.0547	0.0564	0.0448	0.0512	0.0464	0.0476	0.0566	0.0473	0.0478
		1.7142	0.1773	1.5206	1.2616	1.4031	0.5278	1.2121	0.7325	0.759	1.2772	0.8486	0.9354		0.0639	0.0428	0.0557	0.0519	0.0521	0.0441	0.0462	0.0431	0.0407	0.0541	0.0475	0.0487
		0.99	0.1151	1.1716	1.3747	1.0783	1.2	0.866	0.5761	1.1632	0.8738	1.1719	1.2174		0.0524	0.0417	0.0553	0.0498	0.0458	0.0504	0.039	0.0349	0.0429	0.0448	0.0537	0.0515
		0.9689	0.1173	1.1963	1.37	1.0791	1.2112	1.001	0.5774	1.2081	0.9424	1.1579	1.2293		0.0524	0.0422	0.0548	0.0586	0.0516	0.0539	0.0489	0.0446	0.054	0.0495	0.0543	0.053
		0.5186	0.0573	1.2923	1.1018	1.1928	0.853	0.8141	0.6516	0.7033	0.9528	0.9902	0.0616		0.0471	0.0406	0.0568	0.0552	0.053	0.0488	0.0482	0.0465	0.047	0.0499	0.0525	0.0414
		0.5162	0.0592	1.4006	1.1773	1.2281	0.8918	0.8483	0.6963	0.7453	0.9814	1.0168	0.0577		0.0467	0.0407	0.0578	0.0505	0.0521	0.0487	0.047	0.0462	0.0463	0.0515	0.0517	0.0389
~End
Original Filename: TGF-Beta Dr Ismail HUSM_18.05.2021 Excel; Date Last Saved: 18/5/2021 5:40:46 PM

## Sheet: OD Data
##BLOCKS= 1
Plate:	Plate1	1.3	PlateFormat	Endpoint	Absorbance	Raw	FALSE	1						2	450 540	1	12	96	1	8
	Temperature(¡C)	1	2	3	4	5	6	7	8	9	10	11	12		1	2	3	4	5	6	7	8	9	10	11	12
	25.3	2.6073	0.2951	1.0358	1.2002	0.9805	1.272	0.5434	1.2381	0.8982	0.9773	1.046	1.165		0.0748	0.0434	0.0509	0.0532	0.0526	0.0573	0.0438	0.0556	0.051	0.0541	0.0539	0.0523
		2.6649	0.2972	1.0275	1.1796	0.9858	1.2739	0.5663	1.2342	0.9646	0.8798	1.0503	1.1674		0.0755	0.0444	0.0514	0.0525	0.0469	0.0565	0.0443	0.056	0.0525	0.0509	0.054	0.0513
		1.7103	0.1819	1.4746	1.1083	1.4105	0.5163	1.1787	0.732	0.728	1.2603	0.8237	0.8655		0.0637	0.0432	0.0575	0.0547	0.0564	0.0448	0.0512	0.0464	0.0476	0.0566	0.0473	0.0478
		1.7142	0.1773	1.5206	1.2616	1.4031	0.5278	1.2121	0.7325	0.759	1.2772	0.8486	0.9354		0.0639	0.0428	0.0557	0.0519	0.0521	0.0441	0.0462	0.0431	0.0407	0.0541	0.0475	0.0487
		0.99	0.1151	1.1716	1.3747	1.0783	1.2	0.866	0.5761	1.1632	0.8738	1.1719	1.2174		0.0524	0.0417	0.0553	0.0498	0.0458	0.0504	0.039	0.0349	0.0429	0.0448	0.0537	0.0515
		0.9689	0.1173	1.1963	1.37	1.0791	1.2112	1.001	0.5774	1.2081	0.9424	1.1579	1.2293		0.0524	0.0422	0.0548	0.0586	0.0516	0.0539	0.0489	0.0446	0.054	0.0495	0.0543	0.053
		0.5186	0.0573	1.2923	1.1018	1.1928	0.853	0.8141	0.6516	0.7033	0.9528	0.9902	0.0616		0.0471	0.0406	0.0568	0.0552	0.053	0.0488	0.0482	0.0465	0.047	0.0499	0.0525	0.0414
		0.5162	0.0592	1.4006	1.1773	1.2281	0.8918	0.8483	0.6963	0.7453	0.9814	1.0168	0.0577		0.0467	0.0407	0.0578	0.0505	0.0521	0.0487	0.047	0.0462	0.0463	0.0515	0.0517	0.0389
~End
Original Filename: TGF-Beta Dr Ismail HUSM_18.05.2021 Excel; Date Last Saved: 18/5/2021 5:40:46 PM
		OD 450 - 540													OD-Blank
		2.5325	0.2517	0.9849	1.147	0.9279	1.2147	0.4996	1.1825	0.8472	0.9232	0.9921	1.1127		2.5149	0.2341	0.9673	1.1294	0.9103	1.1971	0.482	1.1649	0.8296	0.9056	0.9745	1.0951
		2.5894	0.2528	0.9761	1.1271	0.9389	1.2174	0.522	1.1782	0.9121	0.8289	0.9963	1.1161		2.5718	0.2352	0.9585	1.1095	0.9213	1.1998	0.5044	1.1606	0.8945	0.8113	0.9787	1.0985
		1.6466	0.1387	1.4171	1.0536	1.3541	0.4715	1.1275	0.6856	0.6804	1.2037	0.7764	0.8177		1.629	0.1211	1.3995	1.036	1.3365	0.4539	1.1099	0.668	0.6628	1.1861	0.7588	0.8001
		1.6503	0.1345	1.4649	1.2097	1.351	0.4837	1.1659	0.6894	0.7183	1.2231	0.8011	0.8867		1.6327	0.1169	1.4473	1.1921	1.3334	0.4661	1.1483	0.6718	0.7007	1.2055	0.7835	0.8691
		0.9376	0.0734	1.1163	1.3249	1.0325	1.1496	0.827	0.5412	1.1203	0.829	1.1182	1.1659		0.92	0.0558	1.0987	1.3073	1.0149	1.132	0.8094	0.5236	1.1027	0.8114	1.1006	1.1483
		0.9165	0.0751	1.1415	1.3114	1.0275	1.1573	0.9521	0.5328	1.1541	0.8929	1.1036	1.1763		0.8989	0.0575	1.1239	1.2938	1.0099	1.1397	0.9345	0.5152	1.1365	0.8753	1.086	1.1587
		0.4715	0.0167	1.2355	1.0466	1.1398	0.8042	0.7659	0.6051	0.6563	0.9029	0.9377	0.0202		0.4539	-0.0009	1.2179	1.029	1.1222	0.7866	0.7483	0.5875	0.6387	0.8853	0.9201	0.0026
		0.4695	0.0185	1.3428	1.1268	1.176	0.8431	0.8013	0.6501	0.699	0.9299	0.9651	0.0188		0.4519	0.0009	1.3252	1.1092	1.1584	0.8255	0.7837	0.6325	0.6814	0.9123	0.9475	0.0012
			AVG
		Blank	0.0176
			1	2	3	4	5	6	7	8	9	10	11	12
		A	S1	S5	sample 1	sample 5	sample 9	sample 13	sample 17	sample 21	sample 25	sample 29	sample 33	sample 37
		B	S1	S5	sample 1	sample 5	sample 9	sample 13	sample 17	sample 21	sample 25	sample 29	sample 33	sample 37
		C	S2	S6	sample 2	sample 6	sample 10	sample 14	sample 18	sample 22	sample 26	sample 30	sample 34	sample 38
		D	S2	S6	sample 2	sample 6	sample 10	sample 14	sample 18	sample 22	sample 26	sample 30	sample 34	sample 38
		E	S3	S7	sample 3	sample 7	sample 11	sample 15	sample 19	sample 23	sample 27	sample 31	sample 35	sample 39
		F	S3	S7	sample 3	sample 7	sample 11	sample 15	sample 19	sample 23	sample 27	sample 31	sample 35	sample 39
		G	S4	B	sample 4	sample 8	sample 12	sample 16	sample 20	sample 24	sample 28	sample 32	sample 36
		H	S4	B	sample 4	sample 8	sample 12	sample 16	sample 20	sample 24	sample 28	sample 32	sample 36

## Sheet: Result
	Concentration(pg/mL)	Absorbance	%CV
Standard 1	2000	2.54335	3.00604
Standard 2	1000	1.63085	0.213062
Standard 3	500	0.90945	1.77433
Standard 4	250	0.4529	0.307946
Standard 5	125	0.23465	0.32492
Standard 6	62.5	0.119	2.62613
Standard 7	31.25	0.05665	2.85066
Blank		0.0176
	Concentration (pg/ml)		%CV	Mean Concentration (pg/ml)	Dilution Factor 40x (pg/ml)
Sample 1	536.085	530.742	0.708223	533.412	21336.5
Sample 2	822.471	857.578	2.95519	839.925	33597
Sample 3	617.924	634.09	1.82607	625.987	25039.5
Sample 4	695.859	769.427	7.1004	732.214	29288.6
Sample 5	637.64	624.833	1.43466	631.224	25249
Sample 6	578.376	678.668	11.2832	627.752	25110.1
Sample 7	756.913	747.54	0.881029	752.22	30088.8
Sample 8	574.018	624.641	5.97263	599.136	23965.4
Sample 9	501.765	508.337	0.920027	505.048	20201.9
Sample 10	777.379	775.193	0.199074	776.286	31051.4
Sample 11	565.274	562.185	0.387552	563.729	22549.2
Sample 12	632.995	656.487	2.57641	644.698	25787.9
Sample 13	681.985	683.779	0.185781	682.882	27315.3
Sample 14	246.067	252.595	1.85118	249.33	9973.2
Sample 15	639.321	644.309	0.549529	641.813	25672.5
Sample 16	429.445	451.889	3.60147	440.634	17625.4
Sample 17	261.116	273.15	3.18559	267.128	10685.1
Sample 18	625.089	649.898	2.75175	637.446	25497.9
Sample 19	442.568	516.254	10.8684	479.041	19161.7
Sample 20	407.593	427.782	3.41771	417.662	16706.5
Sample 21	660.741	657.925	0.301979	659.333	26373.3
Sample 22	362.507	364.62	0.410948	363.563	14542.5
Sample 23	283.497	278.967	1.13909	281.231	11249.2
Sample 24	318.176	342.86	5.2808	330.488	13219.5
Sample 25	454.27	492.369	5.69171	473.221	18928.8
Sample 26	359.619	380.755	4.03717	370.162	14806.5
Sample 27	620.48	642.234	2.43646	631.321	25252.8
Sample 28	346.279	369.967	4.67703	358.093	14323.7
Sample 29	498.965	443.666	8.29648	471.109	18844.4
Sample 30	674.696	687.573	1.33684	681.122	27244.9
Sample 31	443.723	481.015	5.70308	462.277	18491.1
Sample 32	486.92	502.958	2.29142	494.921	19796.8
Sample 33	540.468	543.031	0.334422	541.749	21670
Sample 34	413.56	427.667	2.37152	420.601	16824.1
Sample 35	619.137	609.837	1.07025	614.481	24579.2
Sample 36	507.619	524.087	2.25744	515.834	20633.3
Sample 37	615.628	617.796	0.248673	616.712	24668.5
Sample 38	437.204	477.364	6.20996	457.177	18287.1
Sample 39	649.898	656.683	0.734368	653.287	26131.5
